# Supplementary material for: The Effect of Trophic Modes on Biomass and Lipid Production of Five Microalgal Strains
Source: MDPI journal article supplement (doi:10.3390/w14020240), 2022-01-14
Supplement: s1 [file s1]

Archive with 1 entries (1 files):
- water-1494781-supplementary.pdf
