# Supplementary material for: The Effect of Trophic Modes on Biomass and Lipid Production of Five Microalgal Strains
Source: MDPI journal article supplement (doi:10.3390/w14020240), 2022-01-14
Supplement: s1 [file s1 › water-1494781-supplementary.pdf]

## Supplementary Figures

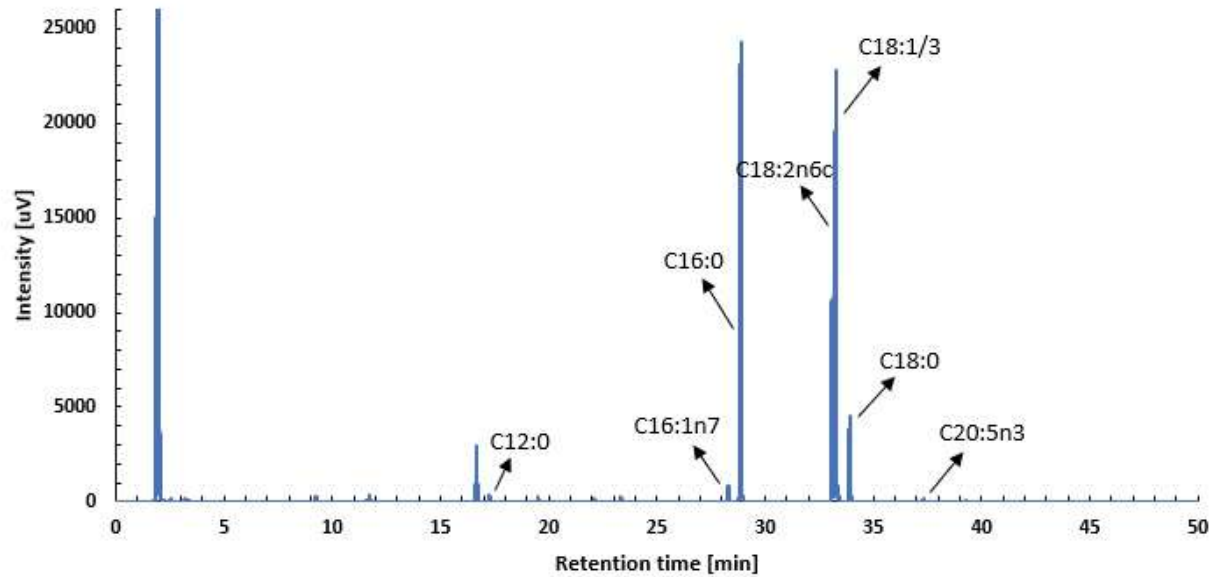

**Figure S1.** Gas chromatography chromatogram of fatty acids formed by *S. obliquus* under mixotrophy. Specific fatty acids are depicted on different chromatographic peaks.
